# Supplementary material for: Higher Risk of HEV Transmission and Exposure among Blood Donors in Europe and Asia in Comparison to North America: A Meta-Analysis
Source: MDPI journal article supplement (doi:10.3390/pathogens12030425), 2023-03-08
Supplement: s1 [file s1]

## Supplementary

**Table S1.** Studies of HEV PCR positivity rates of blood donors worldwide.

| Author                                 | Year | Country         | Number of tested blood donors |
|----------------------------------------|------|-----------------|-------------------------------|
| Fu et al. <sup>[18]</sup>              | 2021 | China           | 1864                          |
| Mishra et al. <sup>[19]</sup>          | 2021 | India           | 13050                         |
| Al Dossary et al. <sup>[20]</sup>      | 2021 | Saudi Arabia    | 806                           |
| Cordes et al. <sup>[21]</sup>          | 2021 | Germany         | 16236                         |
| Spreatico et al. <sup>[22]</sup>       | 2020 | Italy           | 9726                          |
| Maponga et al. <sup>[23]</sup>         | 2020 | South Africa    | 10000                         |
| Spada et al. <sup>[24]</sup>           | 2019 | Italy           | 3912                          |
| Tsoi et al. <sup>[25]</sup>            | 2019 | China           | 8000                          |
| Vercouter et al. <sup>[26]</sup>       | 2019 | Belgium         | 38137                         |
| Lhomme et al. <sup>[27]</sup>          | 2019 | France          | 188082                        |
| Harvala et al. <sup>[28]</sup>         | 2019 | England         | 1838747                       |
| Vollmer et al. <sup>[29]</sup>         | 2019 | Germany         | 7650                          |
| Intharasongkroh et al. <sup>[30]</sup> | 2019 | Thailand        | 30112                         |
| Katiyar et al. <sup>[31]</sup>         | 2018 | India           | 1799                          |
| Wen et al. <sup>[32]</sup>             | 2018 | China           | 5345                          |
| Spada et al. <sup>[33]</sup>           | 2018 | Italy           | 9141                          |
| Thom et al. <sup>[34]</sup>            | 2018 | Scotland        | 94302                         |
| Westhölter et al. <sup>[35]</sup>      | 2018 | Germany         | 18737                         |
| Grabarczyk et al. <sup>[36]</sup>      | 2018 | Poland          | 12664                         |
| Hewitt et al. <sup>[37]</sup>          | 2018 | New Zealand     | 5000                          |
| Hoad et al. <sup>[38]</sup>            | 2017 | Australia       | 74131                         |
| Roth et al. <sup>[39]</sup>            | 2017 | USA             | 128020                        |
| Fearon et al. <sup>[40]</sup>          | 2017 | Canada          | 13993                         |
| Gallian et al. <sup>[41]</sup>         | 2017 | France          | 31879                         |
| Minagi et al. <sup>[42]</sup>          | 2016 | Japan           | 512564                        |
| Shrestha et al. <sup>[43]</sup>        | 2016 | Australia       | 14799                         |
| Vollmer et al. <sup>[44]</sup>         | 2016 | Germany         | 16125                         |
| O’Riordan et al. <sup>[45]</sup>       | 2016 | Ireland         | 24985                         |
| Nouhin et al. <sup>[46]</sup>          | 2016 | Cambodia        | 301                           |
| Harritshøj et al. <sup>[47]</sup>      | 2016 | Denmark         | 25637                         |
| Schreuder et al. <sup>[48]</sup>       | 2015 | South Caribbean | 600                           |
| Stramer et al. <sup>[49]</sup>         | 2015 | USA             | 18829                         |
| Fischer et al. <sup>[50]</sup>         | 2015 | Austria         | 58915                         |

|                                  |      |            |       |
|----------------------------------|------|------------|-------|
| Sauleda et al. <sup>[51]</sup>   | 2015 | Spain      | 9998  |
| Petrović et al. <sup>[52]</sup>  | 2014 | Serbia     | 200   |
| Slot et al. <sup>[53]</sup>      | 2013 | Netherland | 40176 |
| Xu et al. <sup>[54]</sup>        | 2013 | USA        | 1939  |
| Cleland et al. <sup>[55]</sup>   | 2013 | Scotland   | 43560 |
| Meldal et al. <sup>[56]</sup>    | 2013 | Ghana      | 239   |
| Vollmer et al. <sup>[57]</sup>   | 2012 | Germany    | 200   |
| Guo et al. <sup>[58]</sup>       | 2010 | China      | 44816 |
| Herremans et al. <sup>[59]</sup> | 2007 | Netherland | 50    |
| Khuroo et al. <sup>[60]</sup>    | 2004 | India      | 107   |
| Arankalle et al. <sup>[61]</sup> | 1999 | India      | 200   |

**Table S2.** Studies of HEV seroprevalence of blood donors worldwide.

| Author                               | Year | Country          | Number of tested blood donors |
|--------------------------------------|------|------------------|-------------------------------|
| Al Dossary et al. <sup>[20]</sup>    | 2021 | Saudi Arabia     | 806                           |
| Costa et al.† <sup>[62]</sup>        | 2021 | Brazil           | 80                            |
| Fu et al.† <sup>[18]</sup>           | 2021 | China            | 1864                          |
| Wong et al.† <sup>[63]</sup>         | 2021 | Malaysia         | 1003                          |
| Baymakova et al. <sup>[64]</sup>     | 2021 | Bulgaria         | 555                           |
| Di Lello et al. <sup>[65]</sup>      | 2020 | Argentina        | 391                           |
| Maponga et al. <sup>[23]</sup>       | 2020 | South Africa     | 250                           |
| Banguesses et al. <sup>[66]</sup>    | 2020 | Uruguay          | 400                           |
| Spreafico et al. <sup>[22]</sup>     | 2020 | Italy            | 767                           |
| Capai et al. <sup>[67]</sup>         | 2020 | France           | 2705                          |
| Spada et al.† <sup>[24]</sup>        | 2019 | Italy            | 3912                          |
| Yroni et al.† <sup>[68]</sup>        | 2019 | France           | 99                            |
| Arce et al. <sup>[69]</sup>          | 2019 | Argentina        | 813                           |
| Capai et al. <sup>[70]</sup>         | 2019 | France           | 467                           |
| Jupattanasin et al. <sup>[71]</sup>  | 2019 | Thailand         | 630                           |
| Yaşar et al. <sup>[72]</sup>         | 2019 | Turkey           | 4022                          |
| Moss da Silva et al. <sup>[73]</sup> | 2019 | Brazil           | 281                           |
| Miletić et al.† <sup>[74]</sup>      | 2019 | Croatia          | 1036                          |
| Twagirumugabe et al. <sup>[75]</sup> | 2019 | Rwanda           | 642                           |
| Slavov et al. <sup>[76]</sup>        | 2019 | Brazil           | 91                            |
| Chen et al.† <sup>[77]</sup>         | 2019 | China            | 4041                          |
| Dimeglio et al.† <sup>[78]</sup>     | 2018 | French Polynesia | 300                           |
| Tripathy et al.† <sup>[79]</sup>     | 2018 | India            | 2447                          |
| Niederhauser et al. <sup>[80]</sup>  | 2018 | Switzerland      | 3609                          |
| Katiyar et al. <sup>[31]</sup>       | 2018 | India            | 613                           |

|                                        |      |                 |       |
|----------------------------------------|------|-----------------|-------|
| Hardtke et al. <sup>[81]</sup>         | 2018 | Brazil          | 199   |
| Al-Absi et al. <sup>†[82]</sup>        | 2018 | Qatar           | 1049  |
| Bura et al. <sup>[83]</sup>            | 2018 | Poland          | 110   |
| Wen et al. <sup>†[32]</sup>            | 2018 | China           | 5345  |
| Spada et al. <sup>[33]</sup>           | 2018 | Italy           | 9141  |
| Mooij et al. <sup>[84]</sup>           | 2018 | Netherland      | 1562  |
| Thom et al. <sup>[34]</sup>            | 2018 | Scotland        | 1714  |
| Grabarczyk et al. <sup>†[36]</sup>     | 2018 | Poland          | 3079  |
| Hewitt et al. <sup>[37]</sup>          | 2018 | New Zealand     | 1013  |
| Juhl et al. <sup>[85]</sup>            | 2017 | Germany         | 357   |
| Galli et al. <sup>[86]</sup>           | 2017 | Italy           | 1370  |
| Bura et al. <sup>[87]</sup>            | 2017 | Poland          | 105   |
| Passos-Castilho et al. <sup>[88]</sup> | 2017 | Brazil          | 500   |
| Bura et al. <sup>[89]</sup>            | 2017 | Poland          | 246   |
| Pandolfi et al. <sup>[90]</sup>        | 2017 | Brazil          | 780   |
| Gupta et al. <sup>†[91]</sup>          | 2016 | Nepal           | 581   |
| Nasrallah et al. <sup>†[92]</sup>      | 2017 | Qatar           | 5854  |
| Slot et al. <sup>[93]</sup>            | 2017 | Netherland      | 850   |
| Fearon et al. <sup>[40]</sup>          | 2017 | Canada          | 4102  |
| Lopes et al. <sup>†[94]</sup>          | 2017 | South Africa    | 300   |
| Wang et al. <sup>†[95]</sup>           | 2017 | China           | 4046  |
| Abravanel et al. <sup>†[96]</sup>      | 2017 | France          | 600   |
| De Sabato et al. <sup>[97]</sup>       | 2017 | Italy           | 170   |
| Shrestha et al. <sup>†[98]</sup>       | 2016 | Nepal           | 1845  |
| Lange et al. <sup>†[99]</sup>          | 2016 | Norway          | 1200  |
| Parsa et al. <sup>†[100]</sup>         | 2016 | Iran            | 700   |
| O’Riordan et al. <sup>[45]</sup>       | 2016 | Ireland         | 1071  |
| Lucarelli et al. <sup>[101]</sup>      | 2016 | Italy           | 313   |
| Nouhin et al. <sup>†[46]</sup>         | 2016 | Cambodia        | 301   |
| Heamizadeh et al. <sup>[102]</sup>     | 2016 | Iran            | 559   |
| Mansuy et al. <sup>†[103]</sup>        | 2016 | France          | 10569 |
| Traoré et al. <sup>†[104]</sup>        | 2016 | Burkina Faso    | 1497  |
| Ricco et al. <sup>†[105]</sup>         | 2016 | Italy           | 199   |
| Naeimi et al. <sup>[106]</sup>         | 2015 | Iran            | 628   |
| Schreuder et al. <sup>†[48]</sup>      | 2015 | South Caribbean | 600   |
| Norder et al. <sup>†[107]</sup>        | 2015 | Sweden          | 500   |
| Puttini et al. <sup>[108]</sup>        | 2015 | Italy           | 132   |
| Sarkar et al. <sup>[109]</sup>         | 2015 | USA             | 63    |

|                                         |      |              |       |
|-----------------------------------------|------|--------------|-------|
| Passos-Castilho et al. <sup>[110]</sup> | 2015 | Brazil       | 300   |
| Mansuy et al. <sup>†[111]</sup>         | 2015 | France       | 3353  |
| Holm et al. <sup>[112]</sup>            | 2015 | Denmark      | 504   |
| Fischer et al. <sup>[50]</sup>          | 2015 | Austria      | 1203  |
| Sauleda et al. <sup>[51]</sup>          | 2014 | Spain        | 1082  |
| Shrestha et al. <sup>[113]</sup>        | 2014 | Australia    | 3237  |
| Ben-Ayed et al. <sup>[114]</sup>        | 2014 | Tunisia      | 426   |
| Petrović et al. <sup>[52]</sup>         | 2014 | Serbia       | 158   |
| Zhuang et al. <sup>[115]</sup>          | 2014 | China        | 486   |
| Hogema et al. <sup>[116]</sup>          | 2014 | Netherland   | 6488  |
| Pittaras et al. <sup>[117]</sup>        | 2014 | Greece       | 265   |
| Ren et al. <sup>†[118]</sup>            | 2014 | China        | 9719  |
| Jahromi et al. <sup>†[119]</sup>        | 2013 | Iran         | 477   |
| Ramezani et al. <sup>†[120]</sup>       | 2013 | Iran         | 52    |
| Slot et al. <sup>[53]</sup>             | 2013 | Netherland   | 5239  |
| Johargy et al. <sup>†[121]</sup>        | 2013 | Saudi Arabia | 900   |
| Xu et al. <sup>†[54]</sup>              | 2013 | USA          | 1939  |
| Ehteram et al. <sup>[122]</sup>         | 2013 | Iran         | 530   |
| Cleland et al. <sup>†[55]</sup>         | 2013 | Scotland     | 2087  |
| Scotto et al. <sup>†[123]</sup>         | 2013 | Italy        | 151   |
| Juhl et al. <sup>[124]</sup>            | 2013 | Germany      | 1019  |
| Traoré et al. <sup>[125]</sup>          | 2012 | Burkina Faso | 178   |
| Meldal et al. <sup>†[56]</sup>          | 2012 | Ghana        | 239   |
| Vollmer et al. <sup>†[57]</sup>         | 2012 | Germany      | 200   |
| Silva et al. <sup>[126]</sup>           | 2012 | Brazil       | 110   |
| Cheng et al. <sup>[127]</sup>           | 2012 | China        | 546   |
| Neffati et al. <sup>[128]</sup>         | 2012 | Tunisia      | 687   |
| Dremsek et al. <sup>[129]</sup>         | 2011 | Germany      | 298   |
| Mansuy et al. <sup>[130]</sup>          | 2011 | France       | 512   |
| Dong et al. <sup>[131]</sup>            | 2011 | USA          | 372   |
| Krumbholz et al. <sup>[132]</sup>       | 2011 | Germany      | 116   |
| Kaufmann et al. <sup>[133]</sup>        | 2011 | Switzerland  | 550   |
| Beale et al. <sup>[134]</sup>           | 2010 | England      | 262   |
| Takeda et al. <sup>[135]</sup>          | 2010 | Japan        | 12600 |
| Guo et al. <sup>†[58]</sup>             | 2010 | China        | 44816 |
| Masia et al. <sup>[136]</sup>           | 2009 | Italy        | 402   |
| Christensen et al. <sup>[137]</sup>     | 2008 | Denmark      | 630   |
| Dalton et al. <sup>[138]</sup>          | 2008 | England      | 500   |

|                                        |      |              |      |
|----------------------------------------|------|--------------|------|
| Mansuy et al. <sup>[139]</sup>         | 2008 | France       | 529  |
| Assarehzadegan et al. <sup>[140]</sup> | 2008 | Iran         | 400  |
| Taremi et al. <sup>[141]</sup>         | 2007 | Iran         | 399  |
| Dalton et al. <sup>[142]</sup>         | 2007 | New Zealand  | 265  |
| Boutrouille et al. <sup>[143]</sup>    | 2007 | France       | 1998 |
| Herremans et al. <sup>†[59]</sup>      | 2007 | Netherland   | 50   |
| Bortoliero et al. <sup>[144]</sup>     | 2006 | Brazil       | 996  |
| Fukuda et al. <sup>[145]</sup>         | 2004 | Japan        | 4256 |
| Khuroo et al. <sup>[60]</sup>          | 2004 | India        | 107  |
| Engle et al. <sup>[146]</sup>          | 2002 | USA          | 230  |
| Meng et al. <sup>[147]</sup>           | 2002 | USA          | 400  |
| Kiesslich et al. <sup>[148]</sup>      | 2002 | Brazil       | 227  |
| Trinta et al. <sup>[149]</sup>         | 2001 | Brazil       | 93   |
| Arankalle et al. <sup>†[61]</sup>      | 2000 | India        | 412  |
| Gonçales et al. <sup>[150]</sup>       | 2000 | Brazil       | 165  |
| Lemos et al. <sup>†[151]</sup>         | 2000 | Cuba         | 1149 |
| Jutavijittum et al. <sup>[152]</sup>   | 2000 | Thailand     | 636  |
| Arankalle et al. <sup>[61]</sup>       | 1999 | India        | 200  |
| Karetnyi et al. <sup>[153]</sup>       | 1999 | USA          | 443  |
| Konomi et al. <sup>†[154]</sup>        | 1999 | Bolivia      | 574  |
| Seow et al. <sup>[155]</sup>           | 1999 | Malaysia     | 100  |
| Mateos et al. <sup>[156]</sup>         | 1999 | Spain        | 863  |
| Dalekos et al. <sup>[157]</sup>        | 1998 | Greece       | 3016 |
| Abdelaal et al. <sup>[158]</sup>       | 1998 | Saudi Arabia | 593  |
| Pavia et al. <sup>[159]</sup>          | 1998 | Italy        | 360  |
| Araujo et al. <sup>[160]</sup>         | 1997 | Portugal     | 341  |
| Mast et al. <sup>[161]</sup>           | 1997 | USA          | 5000 |
| Thomas et al. <sup>[162]</sup>         | 1997 | USA          | 811  |
| Rey et al. <sup>[163]</sup>            | 1997 | Argentina    | 2157 |
| Poovorawan et al. <sup>[164]</sup>     | 1996 | Thailand     | 178  |
| Bernal et al. <sup>[165]</sup>         | 1995 | Spain        | 492  |
| Zaaijier et al. <sup>[166]</sup>       | 1995 | Netherland   | 1275 |
| Moavenm et al. <sup>[167]</sup>        | 1995 | Australia    | 279  |
| Peng et al. <sup>[168]</sup>           | 1995 | Taiwan       | 281  |
| Zanetti et al. <sup>[169]</sup>        | 1994 | Italy        | 948  |
| Lavanchy et al. <sup>[170]</sup>       | 1994 | Switzerland  | 94   |
| Gajjar et al. <sup>‡[171]</sup>        | 2014 | India        | 460  |

|                                  |      |       |     |
|----------------------------------|------|-------|-----|
| Utba et al.‡ <sup>[172]</sup>    | 2013 | Iraq  | 212 |
| Ibrahim et al.‡ <sup>[173]</sup> | 2011 | Egypt | 760 |

† anti-HEV IgG and IgM

‡ only anti-HEV IgM

---
